# Supplementary material for: Cryo electron tomography with volta phase plate reveals novel structural foundations of the 96-nm axonemal repeat in the pathogen Trypanosoma brucei
Source: eLife. 2019 Nov 11;8:e52058. doi: 10.7554/eLife.52058 (PMC6974359; doi:10.7554/eLife.52058)
Supplement: Figure 2—source data 1. [file elife-52058-fig2-data1.xlsx]

## Sheet: Sheet1
Filament Length (um)
13
16.056
19.502
20.25
20.086
22.861
23.39
23.626
23.691
24.594
25.002
25.276
25.569
25.999
26.008
26.047
26.262
26.278
26.323
26.346
26.372
26.447
26.729
27.005
27.113
27.512
27.739
27.814
27.816
27.817
27.94
28.093
28.336
28.61
28.674
28.733
